# Supplementary material for: Synthesis of Fe3O4 nanobead-functionalized 8-hydroxyquinoline sulfonic acid supported by an ion-imprinted biopolymer as a recognition site for Al3+ ions: estimation in human serum and water samples
Source: Royal Society of Chemistry journal article supplement (doi:10.1039/c8nj01141a), 2018-01-01
Supplement: c8nj01141a1.pdf [file c8nj01141a1.pdf]

## Supporting information

### **Synthesis of Fe<sub>3</sub>O<sub>4</sub> nanobeads functionalized 8-hydroxyquinoline sulfonic acid supported with ion imprinted biopolymer as a recognition site for Al<sup>3+</sup> ions: estimation in human serum and water samples**

Mohamed M. El-Wekil<sup>\*1</sup>, Hassan Refat H. Ali<sup>1</sup>, Adel A. Marzouk<sup>2</sup>, Ramadan Ali<sup>3</sup>

<sup>1</sup> Department of Pharmaceutical Analytical Chemistry, Faculty of Pharmacy, Assiut University, Assiut, Egypt.

<sup>2</sup> Department of Pharmaceutical Chemistry, Faculty of Pharmacy, Al Azhar University, Assiut, Egypt.

<sup>3</sup> Department of Pharmaceutical Analytical Chemistry, Faculty of Pharmacy, Al Azhar University, Assiut, Egypt.

\* Corresponding author: mohamed.mohamoud@ymail.com

## Figures

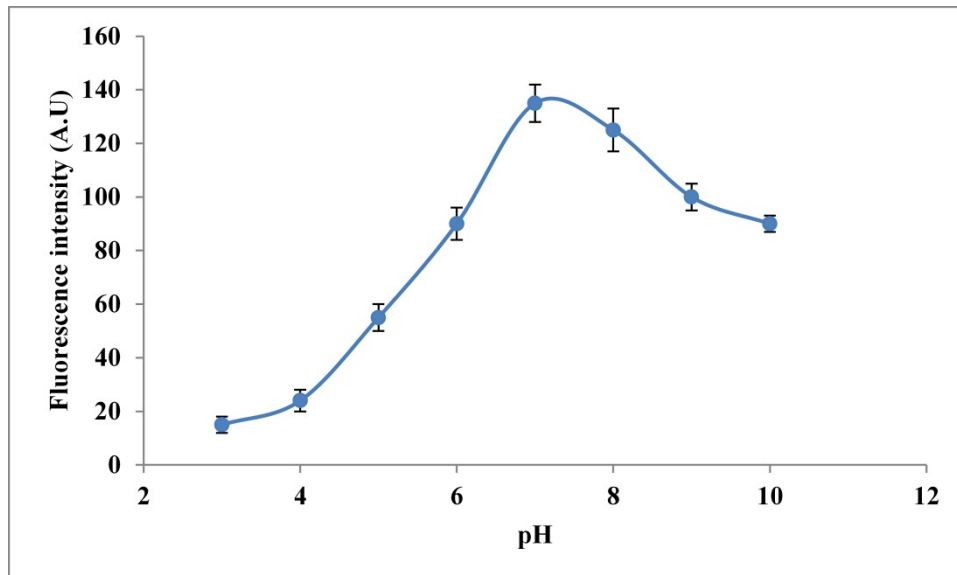

**Figure 1S.** Effect of pH on fluorescence intensity of the formed complex using MGIIBP. Error bars,  $n=5$ .  $\text{Al}^{3+}$  concentration was  $1.9 \times 10^{-8}$  M.

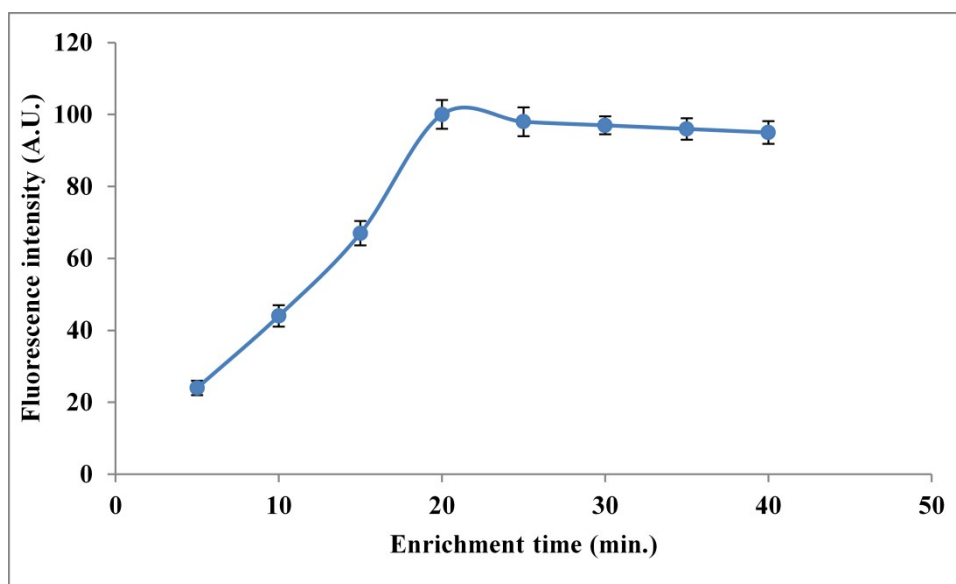

**Figure 2S.** Effect of enrichment-complexation time on fluorescence intensity of the formed complex using MGIIBP. Error bars,  $n=5$ .  $\text{Al}^{3+}$  concentration was  $1.9 \times 10^{-8}$  M.

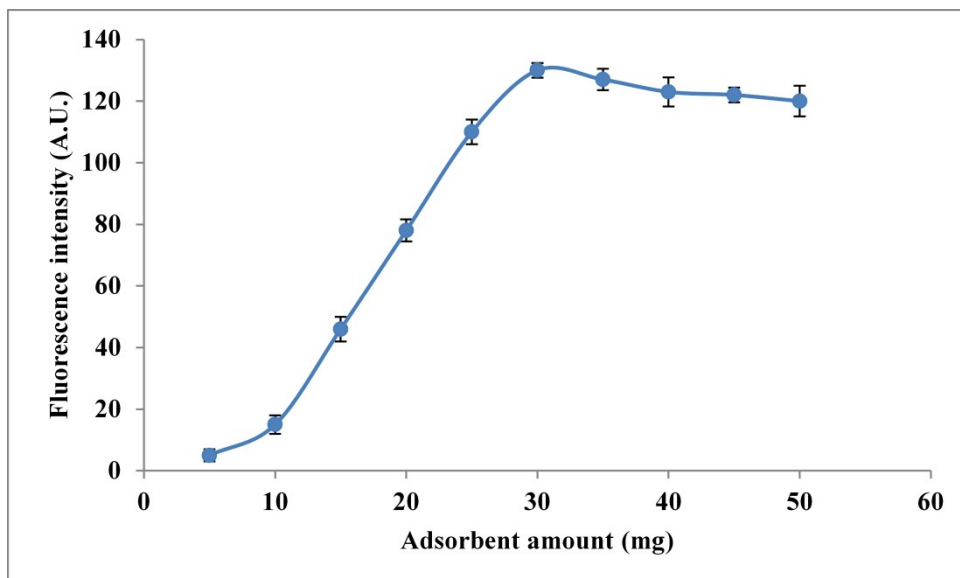

**Figure 3S.** Effect of adsorbent amount on fluorescence intensity of the formed complex using MGIIBP Error bars, n=5.  $\text{Al}^{3+}$  concentration was  $1.9 \times 10^{-8}$  M.

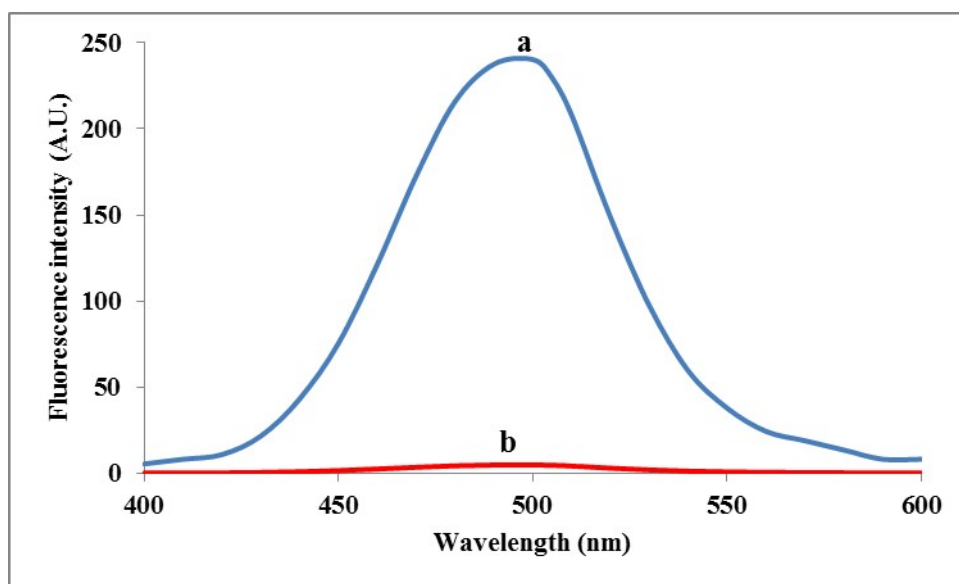

**Figure 4S.** Effect of time on removal of Al<sup>3+</sup> ion from MGINIBP by NaF after (a) zero hrs and (b) 12 hrs.

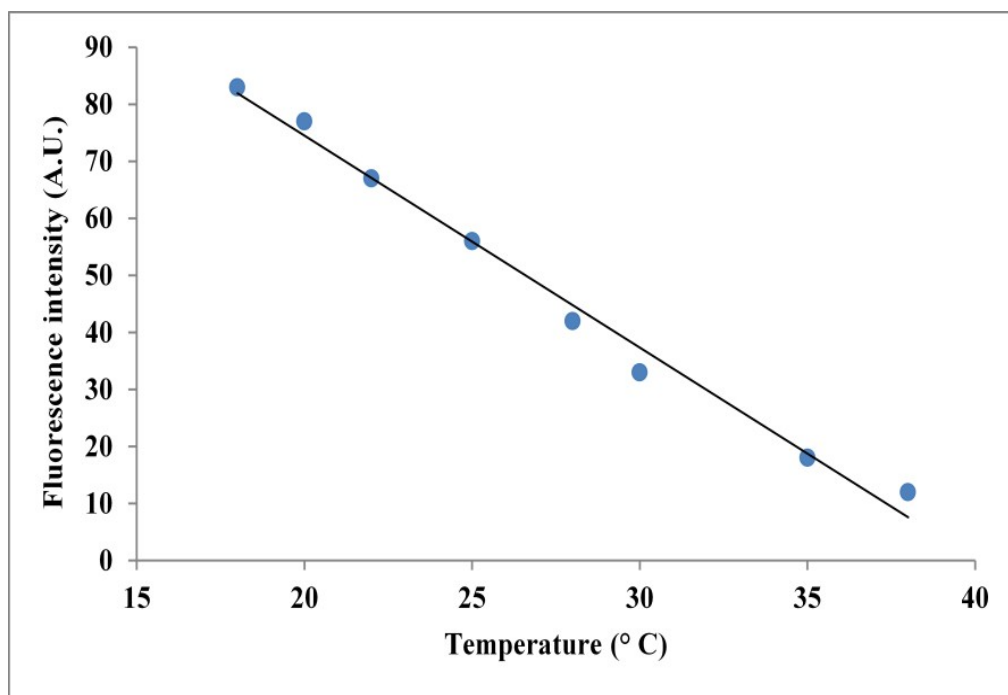

**Figure 5S.** Effect of temperature on fluorescence intensity of the formed complex using MGIIBP. $\text{Al}^{3+}$  concentration was  $1.9 \times 10^{-8}$  M.
